# Supplementary material for: The GRAS gene family in pine: transcript expression patterns associated with the maturation-related decline of competence to form adventitious roots
Source: PubMed Central journal article supplement (PMC4302573; doi:10.1186/s12870-014-0354-8), 2014-12-30

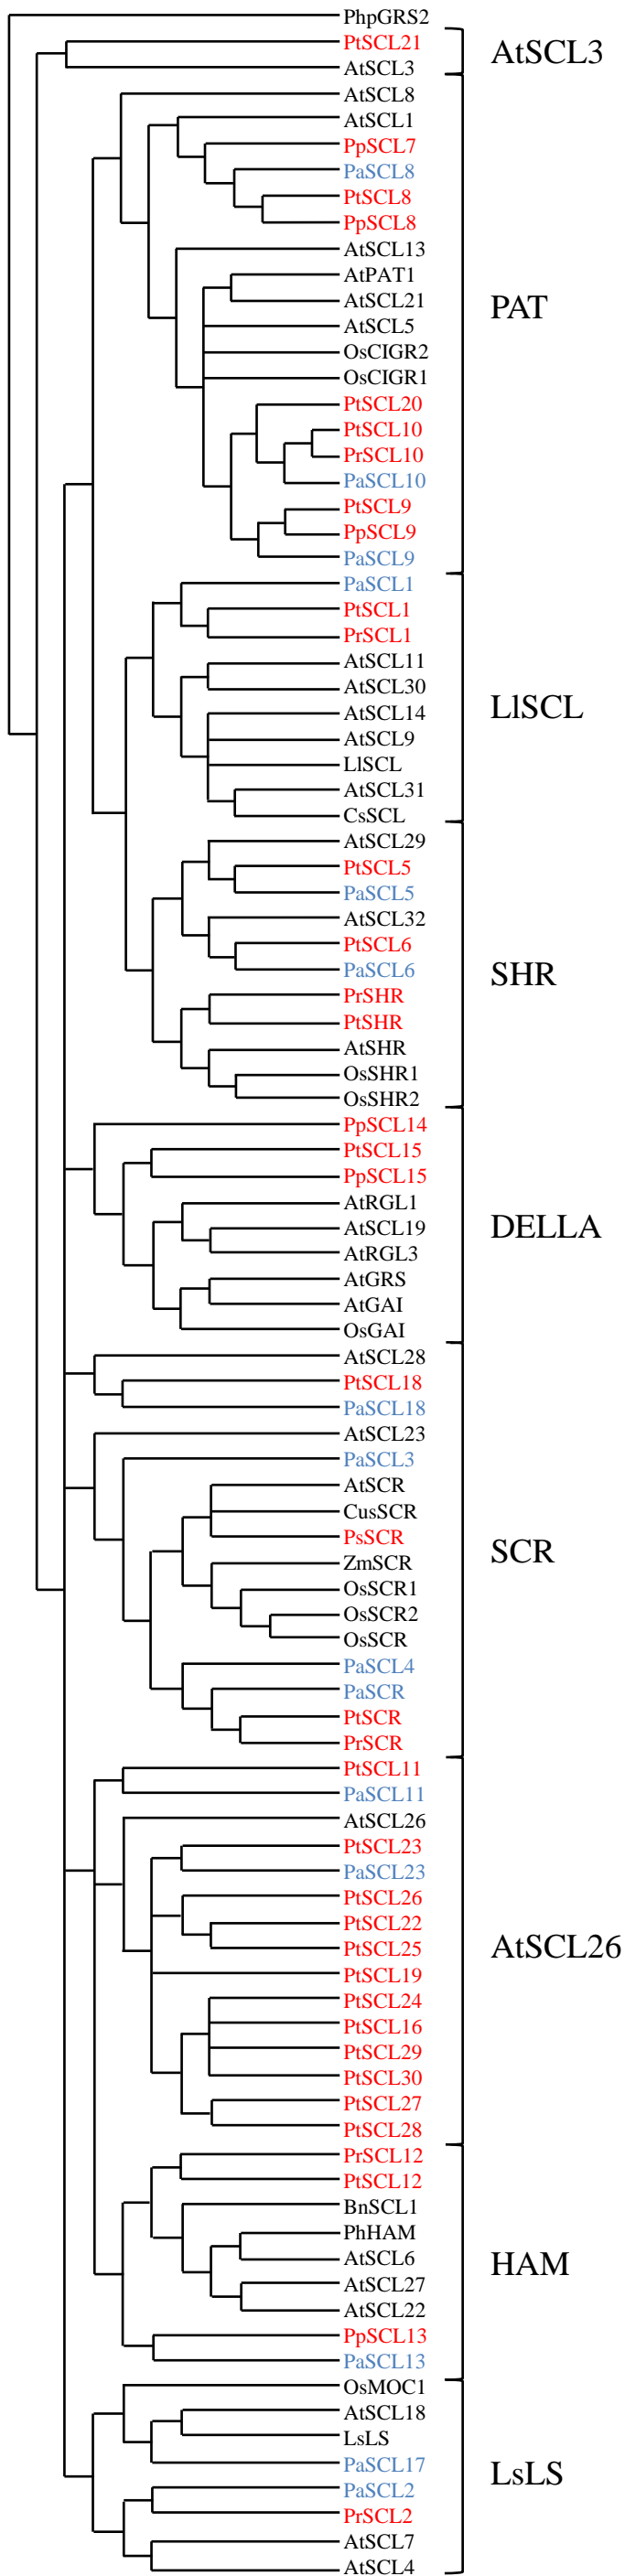

Supplement: 12870_2014_354_MOESM2_ESM.pdf [file 12870_2014_354_MOESM2_ESM.pdf]
