# Supplementary material for: The GRAS gene family in pine: transcript expression patterns associated with the maturation-related decline of competence to form adventitious roots
Source: PubMed Central journal article supplement (PMC4302573; doi:10.1186/s12870-014-0354-8), 2014-12-30
Supplement: 12870_2014_354_MOESM3_ESM.pdf [file 12870_2014_354_MOESM3_ESM.pdf]

# SCR

LHRI

\* \* \* \* \* \* \* \* \* \* \* \* \* \* \* \*

AtSCR LHLTLTLLQCAEAVSADNLEEANKLLEISQLSTPYGTSAQRVAAYFSEAM SARLLNSCLGIYAALP-SRWMPQTHSLKMVSFAQVFNGISPLVKFSH  
PsSCR LHLTLTLLQCAEAVSAENLEQANKMLLEISQLSTPFGTSAQRVAAYFSEAI SARLVSSCLGIYATLP-VSSHTP-HNQKVASAFQVFNGISPFVKFSH  
OsSCR LHLTLTLLQCAEAVSNADNLEAHRALLEIAELATPFGTSTQRVAAYFAEAM SARLVSSCLGIYAPLPNPSFAAARLHGRVAAAFQVFNGISPFVKFSH  
ZmSCR LHLTLTLLQCAEAVNADNLDAAHQTLLEIAELATPFGTSTQRVAAYFAEAM SARLVSSCLGIYAPLP PGPSPAAARLHGRVAAAFQVFNGISPFVKFSH  
PrSCR LHLLALLQCAEAVSADNFEANTILPQITELSTPYGNVQRVAAYFAEAM SARLVSSCIGMYSPLP---PIHMSQSQKIVNAFQVFNGISPFVKFSH  
PaSCL3 LHLLSLLLQCAEAI SMDKIQQAYSILPQLSEFSTPYGNPQRVAAYFAEGMAARLHNSYLG LCCPLEISR PQLV SINHNFLTA FQT FNSTC PPFVKFSH  
PaSCL4 LHLLALLQCAEAV SEDNHEEANSILPHIYELSSPYGSSVHRVAAYFAEALS CRLFSSYIGIYSPI-----MNESRSQSIVSAFQLYNGISPFVKFSH  
PtSCL18 LELANLLIACAEAVTSKNVQLVNRLLSRLGELASPESPPMHRVAAYFTEGLTLRVTKLWPHIFQPI---VGDLDLCEDELITGFQLLNHTTPIPKF--

VHIID

\* \* \* \* \*

LHRII

\* \* \* \* \*

AtSCR F--TANQAIQEAF EKEDSVHIIDL DIMQGLQWPGLFHILASRPGGPPHVR L TGLGTSMEALQATGKRLSDFTDKLG L PPF EFCPLAEKVG N LDT--ERL  
PsSCR F--TANQAIQEAFEREERVHIIDL DIMQGLQWPGLFHILASRPGGPPYVR L TGLGTSME TLEATGKRLSDFANKLGL PPF EFPVAEKVGNIDV--EKL  
OsSCR F--TANQAIQEAFEREERVHIIDL DIMQGLQWPGLFHILASRPGGPPRVR L TGLGASMEALEATGKRLSDFADTLGL PPF EFCPVADKAGNLDP--EKL  
ZmSCR F--TANQAIQEAFEREERVHIIDL DIMQGLQWPGLFHILASRPGGPPRVR L TGLGASMEALEATGKRLSDFADTLGL PPF EFCVAEAKAGNVDP--EKL  
PrSCR F--TANQAIQEAFEREQRVHIIDL DIMQGLQWPGLFHILASRPGGPPHVRITGLGTSLEALEATGKRLSDFAH TLNLP PPF EFPVADKVGKLDP--ERL  
PaSCL3 F--TSNQAIL EAFNGESQVHIIDL DIMQGLQWPGLFHILASRPGGCPHVRITGLGTSMEALEATGKRLS SFAHTLKL PPF EFPVAEKLGQLDP--AVL  
PaSCL4 F--TANQAIQQV FQGENSVHIIDL DIMQGLQWPGLFHILASRPGSPPFVRITGLGTSMEALEATGKRLSNFAETLGI PPF EFHAVSDKVGNIENLERL  
PtSCL18 FQYTANEVILKAFEDKDRVHIIDFDI-QGLQWPALFHS LATRPRPPSHVRITGIGESKEDLQDTGDRLAGFAEALNLP PPF EFHAVVDKL--EDVRLWML

PFYRE

\* \* \* \* \*

AtSCR NVRKREAVAVH-WLQ-H-SLYDVTGSDAHTLWLLQRLAPKVVTVVEQDLSH-AGSFLGRFVEAIHYYSALFDSL GASYGEESEERHVVEQQLSKEIR  
PsSCR NVSKSEAVAVH-WLQ-H-SLYDVTGSDTNTLWLLQRLAPKVVTVVEQDLSN-AGSFLGRFVEAIHYYSALFDSL GSSYGESEERHVVEQQLSREIR  
OsSCR GVTREAVAVH-WLR-H-SLYDVTGSDSNTLWLIQRLAPKVVTMVEQDLSH-SGSFLARFVEAIHYYSALFDSL DASYGSDSPERHVVEQQLSREIR  
ZmSCR GVTREAVAVH-WLH-H-SLYDVTGSDSNTLWLIQRLAPKVVTMVEQDLSH-SGSFLARFVEAIHYYSALFDSL DASYGEDSPERHVVEQQLSREIR  
PrSCR KVNREGDALAVH-WLH-H-SLYDVTGSDTNTLRLLQRLSPKVI TMVEQDLSH-GGSFLSRFVEAIHYYSALFDSL GASYPEDSHDRHLVEQQLSREIK  
PaSCL3 RVRSGDALAVH-WLH-H-SLYDVTGSDTCTLRLLQRLNPKVI TMVEQDLNT-VGPFLNRFVEALHYYSAMFDALGACFNEDNMERHTVEQQLSHEIR  
PaSCL4 KVRKGDALAVH-WLQ-H-SLYDVTGSDISTLCLLRRLCPKVI TMVEQDLSH-VGSFLNRFVEAIHYYSAVFDSL GAAYPEDSHERHVVEQQLSCEIK  
PtSCL18 HVKEKETVAVN CMLQLHKTLTYDNGAALRGILGLLQSTKPAVVVVVEQEANNDPI FEGRFLQALQYYS AIFDSIDASLPSDS PARLKMEQ-YFAREIR

SAW

\* \* \* \* \*

AtSCR NVLAVGGPSRSGEVVKFESWREKMQCCGFGISLAG-NAATQATLLLGMFP SDGYTLVDDNGTLKLGWKDLSLLTASAWTPRS-----  
PsSCR NVLAVGGPSRSGEIKFHNWREKLQCCGFRGVS LAG-NAATQASLLLGMFPSEGYTLVEDNGILKLGWKDLC LLTASAWRPPYHTNTIIPHNN--  
OsSCR NVLAVGGPARTGDVKFGSWREKLAQSGFRVSS LAG-SAAAQAVLLLGMFP SDGYTLIENGALKLGWKDLC LLTASAWRPIQASGR-----  
ZmSCR NVLAVGGPARTGDVKFGSWREKLAQSGFRAAS LAG-SAAAQASLLLGMFP SDGYTLVEENGALKLGWKDLC LLTASAWRPIQVPPCR-----  
PrSCR NILAVGGPARTGEIKFDNWRDQLKQTGFKPI SLAG-NAATQATLLLGMFP CQGYTLMEENGTLKLGWKGLCLLTASAWRPAHGLIY-----  
PaSCL3 NILAVGGPARTGETKFQNRWTHLQSCGFRQISMRG-NASVQAELLNMFCEGYSLVEEGGILKFGWKDLSLYIASAWTSWTS-----  
PaSCL4 NILAVGGPARTGELRFHNWRDQLQAGFSKLS LAG-NAAAQATLLLGMFPCKGYTLVEESGTLRIGWKDLC LLTASAWRPAHHAL-----  
PtSCL18 NIIACEGP ERIERHEKFEHWKQLMEEGGFTAVPLGEREH CQARILLDMFPCKNYIVKLEDGRLLTDWLHQFLYTASAWAPQEGGNGGASTSSPA





**PAT**

**LHRI**

AtPAT1 RDLRADLVSCAKAMSENDL--MMAHSMMEKLRQMVSVSGEPIQRLGAYLLEGLVAQLASSGSSIYKALNRCPEPAS-TELLSYMHILYEVCYPYFKFGYMSANGAIAEAMK  
 AtSCL1 ATPKQILISCARALSEGKL--EELASMVNELRQIVSIQGDPSQRIAAVMVEGLAARMAASGKFIYRALK-CKEPPS-DERLAAMQVLFVFCPCFKFGFLAANGAILEAIK  
 AtSCL5 GDLKGVLYECAKAVENYDL--EMTDWLISQLQQMVSVSGEPVQRLGAYMLEGLVARLASSGSSIYKALR-CKDPTG-PELLTYMHILYEACPYFKFGYMSANGAIAEAVK  
 OsCIGR2 GNLKELLIACARAVEEKNS--FAIDMMIPELRKIVSVSGEPLERLGAYMVEGLVARLASSGSIYKALK-CKEPKS-SDLLSYMHFLYEACPYFKFGYMSANGAIAEAVK  
 PtSCL7 SS-KQLLVQCATAISEGKE--EMASHIITKLRVSIQGDPMERLAAYMVEGLAARIASSGNGIYKALN-CKAPPS-TDTLSAMQILFEVCPYFKFGCMVANGAICEAFK  
 PpSCL8 SSSRKLVECATAISEGDK--DSALSIKKNLMQVISVYGDPMQRLTAYMVEGLVARLGPASAQSLYNTLK-WKETPIKSDILSATRLLYKVCOPYMKFGCVAAISTILEALK  
 PpSCL9 GDVKELLIAKAKAVSDSDNDSIKIDKLIAEIRQVVISGSDPMQRLGAYMVEGLVARMASGAIYKTLR-CKEPTS-PELLSYMQVLFVFCPYFKFGYMAANGAIAEAFK  
 PrSCL10 GDVKSLLIECAKAIADGRN---ADNLIAGLRQVNIYGDPLHLRAAYMVEGLVARLHFSGGHIYKTLK-CKEPTS-SELLSYMHILYEVCYPYFKFGYVAANGAIAEAFK  
 PtSCL20 GDIKCLLIECAKAIADNRN---ADKLI AELRQAVSIFGDPMQRLGAYMVEGLVARLQFSGGHIYKTLK-CKEPTS-AELLSYMQIFYKICPYFKFGYMSANAVIVEALN

**VHIID**

**LHRII**

AtPAT1 EENRVHIIDFQIGQGSQWVTLIQAFARPGGPPRIRITGIDDMTSAYARGGGLSIVGNRLAKLAKQFNVPFEFNSVSVSVSEVKPKNLGVPRGEALAVNFAFVLHHPDE  
 AtSCL1 GEEEVHIIDFDINQGNQYMTLIRSI AELPGKRPRRLRTGIDDPESVQRSIGGLRIIGLRLEQLAEDNGVSFKFKAMPKSTSI VSPSTLGCKPGETLIVNFAFQLHHPDE  
 AtSCL5 NESFVHIIDFQISQGGQWVSLRALGARPGGPPNVRITGIDDPRSSFARQGGLELVGQRLGKLAEMCGV PFEFHGAALCCTEVEIEKLGVRNGEALAVNFPVLHHPDE  
 OsCIGR2 GEDRIHIIDFHISQGAQWISLLQALARPGGPPPTVRITGIDDSVSA YARGGGLELVGRRLSHIASLCKVPFEFHPLAISGSKVEAAHLGVI PGEALAVNFTLELHHIPDE  
 PtSCL7 DEQKVHIIDFEIGQGSQYISLLKVL AERPGGPPHLRITAVDDSEDVRYIPGGLDNVGRKLEQYAESIGASLQFISIRRKVGDVQWML EINPDEVLAVNFAFQLHHPDE  
 PpSCL8 EEEKVHIIDFEIGEGSQYFTLIDKLAARVGGPPKLRITAVDDPEPISRSVGDLYMLQEQLREIAVQRGVHLEFRIISQKAADVQPYMLDCR PGEALAVNFAFQLHHPDE  
 PpSCL9 DEDRVHIIDFQIAQGSQWVTLIQAL AARFPGPPHVSITGIDDPVSNYARGGGLLVGKRLSKLAEICNV PFEFHPVPMGPDVQVNLKYQAGDALAVNFAFQLHHPDE  
 PrSCL10 DKDRVHIIDFQIAQGSQWVTLIQAFARQGGSPHVRITGVDDPQSEYARGGGLNLVGRRLSKLAESYQV PFEFHGLSVFSGDVHAEMKIRPGEALAVNFPQLHHPDE  
 PtSCL20 DKDRVHIIDFQIALGTQWVPVIQAFARQGGSPHVRITGVDDPVSEFARGQGLQMVGRRLSKLAETYQV PFEFHALPVYASDVHADMLDIRPGEALAVNFHLVHHPDE

**PFYRE**

AtPAT1 SVSTENHRDRLLRMVKSLSPKVVTLVEQESNTNTAAFFPRFMETMNYAAMFESIDVTLPRDHKQRINVEQHCLARDVNNIACEGADRVERHEL LGKWSRFRGMAGFTV  
 AtSCL1 SVTTVNQRDELHLMVKS LNPKLVTVVEQDVNTNTSPFFPRFIEAYEYSAVFESLDMTLPRESQERMNVERQCLARDIVNIVACEGEERIEREYEAAGKWRARMMAGFNP  
 AtSCL5 SVTVENHRDRLRLRVKHLSPNVVTLVEQEA NTNTAPFLPRFVETMNHYLAVFESIDVKLARDHKERINVEQHCLAREVNNIACEGVEREERHEPLGKWSRFRHMAGFKP  
 OsCIGR2 SVSTANHRDRLLRMVKSLSPKVLTLVEMESNTNTAPFPORFAETLDYTAIFESIDLTLPRDDRERINMEQHCLAREIVNLIACEGGERAERYEPFGKWKARLT MAGFRP  
 PtSCL7 SVSTKNLRDRLLRMVKSLNPKVVTVVEQEVNTNTAPFLPRFM EALNYSSVFESLDATIKRDSRDRMNVEKQCLARDIVNIIACEGEERIEREYEVAGKWRARMTMAGFSV  
 PpSCL8 SVSTRNPRDQLLRMVKGLSPKVVTVVEREMNTNTAPFLPRFM EALNYSSVFESLDVSLKRESRERFNI EKQCLARDIVNIVACE DAERIEREYEVAGKWRARMTMAGFTV  
 PpSCL9 SVNTSNHRDRIIRMAKGLAPKVLTLVEQESNTNTAPFFSRFME TSYTAIFESLDVTLTRESKERISVEQHCLARDIVNIIACEGAERIERHELMGKWSRFTMAGFKP  
 PrSCL10 SVNTSNHRDRLLRMVKNFSPNVVTLVEQEA NTNTAPFFPRFMETLSYTTAMFESLDVTLPRDSKERVSVEQHCLARDIVNVIACEGDERVERHELFGKWSRSLTMAGFKS  
 PtSCL20 SVSTNNHRDRLLRMVKGFAFSVVTLVEQEA NTNTAPFFPRFMETLSYTTAMFESLDLTLPRESKERVSVEQHCLARDIVNIIACEGAERVERHELFGKWSRSLTMAGFKS

**SAW**

AtPAT1 YPLSPLVNSTIKSLL-RNYS DKYRLEERD GALYLGWMHRDLVASC AWK-----  
 AtSCL1 KPMSAKVTNNIQNLIKQCYCNKYK LKEEMGELHFCWEEKSLIVASAWR-----  
 AtSCL5 YPLSSYVNATIKGLL-ESYSEKYTLEERD GALYLGWKNQPLITSCAWR-----  
 OsCIGR2 SPLSSLVNATIRTLI-QSYS DNKYLAERD GALYLGWKSRLPVSSAWH-----  
 PtSCL7 YPLSANVKD TVKSLHQSY CNSYKTKEEGGAMYFGWLDRLILIAASAWH-----  
 PpSCL8 YPINTSVDNSIRPLF-ESRGNNYRLKAEKGALHLGWLDKVLVVVSAWHLESHSMIK  
 PpSCL9 YPLSSIVNSTIKSLL-EGYCENYTLLEERD TLYLGLWLNRP LIAAAAFQ-----  
 PrSCL10 YPLSAHVNSTIKVVL-NSYNNYRLIEKDEALYLGWLD RDLIVASAWK-----  
 PtSCL20 HALSSRVNATIKVAL-ESYNQNYRVVEKDDVLYLGLWGRDLYVSSAWK







# LS

LHRI

---

LsLS PAIQIRQLLISCAELLSQSDFSAAKR-LLTILSTNSSPFGDSTERLVHQFTRALSRLRNRYISSTTNHFMPVETTPTDSSSSSSSLALIQSSYLSLNQVT  
 AtSCL4 LEPLPKAIYDCARISDSDPNEASKT--LLQIRESVSELGDPTERVAFYFTEALSNRLSP---NSPATSSS---SSSTEDLILS-----YKTLNDAC  
 OsMOCI AAPSTRDLLACADLLQRGDLPAARRAAEIVLAAAASPRGDAADRILAYHFARALALRVV---AKAGHGHVVVGGGAARPASSG-----AYLAFNQIA  
 PrSCL2 QRSDLLHSLLDCAKIVDTEPERAGQS--VAYLQRIASHHGDPTRQRIASHFADALAKRLSKGIEQKPFQSSDECSKSFEDLTLA-----YKALNDAC  
 PtSCL17 SAAHLRNLLTECAEFVAQCEW-QRADRMISILSTRGSPRGDSTERLVAQFTRALRHRSDLALARRPPPDGATERELES-----AYLCLNQVT

VHIID LHRII

---

LsLS PFIRFTQLTANQAILEAINGNHQAIHIVDFDINHGVQWPPMLQALADRYP---APTLRITGTGN-----DLDTLRRTGDRLLAKFAHSLGLRFQHFHFLY  
 AtSCL4 PYSKFAHLTANQAILEATEK-SNKIHIIVDFGIVQGIQWPALLQALATRTSGK--PTQIRVSGIPAPSLGESPEPSLIATGNRLRDFAKVLDLNFDFIPIL  
 OsMOCI PFLRFAHLTANQAILEAVDG-ARRVHILDLDVAVHGQWPPLLQAIERADPALGPEPVRVTGAGA-----DRDTLLRTGNRLRAFARSIHLPFHFTPLL  
 PrSCL2 PYSKFAQLTGNQAILEAMDK-AEKIHIIVDFGIVQGVQWAALLHAFATRPGGK--PHKIKITGIPAPTLGQNPTSSLLATGKRLTEFAKLLDLEFEFCFVS  
 PtSCL17 PFIRFAHLTANQAILETLDTDSPSIHVVDINIMQGVQWPPFMQALAEPRGGP--PSHIRLTGAGA-----DAEALRKTGRRLERFAHTLGLRFEFNPI

PFYRE

---

LsLS IANNNHDDH-----EDPSIISSIVLLPDETLAINCVFYLRHLLKD-REKLRIFLHRVKSMNPKIIVTIAEKEAN-----HNHPLFLQRFIEA  
 AtSCL4 TPIH-----LLNGSSFRVDPDEVLAVNFMLQLYKLLDEPTIVDTALRLAKSLNPRVVTLGEYEVS-----LNRVGFANRVKNA  
 OsMOCI LSCATTAPHHVAGTSTGAAAAASTAAAATGLEFHPDETLAVNCVMFLHNLG--HDELA AFLKWKVAMSPAVVTIAEREAGGGGGGDHIDDLP RVGVA  
 PrSCL2 KHMS-----EVELSTLKIEQDECI AVNFMLQLYNLLGDSPEPLVKIILKLAHALSPKVVTLGEYEAH-----LNACQFQVRFNA  
 PtSCL17 VDDDI-----SSLAISIRPGE SLAINCVLHLLHELLDEAHNERLKNFLVRIRSLPEKVVALAEREAD-----HNRPTFTDRFVEA

SAW

---

LsLS LDYYTAVFDSLEATLPPGSRERMTVEQVWFGREIVDI VAMEG-DKRKERHERFRSWEVMLRSCGF SNVALSPFALSQA KLLLRLHYPSEGYQLGVS-SNS  
 AtSCL4 LQFYSAVFESLEPNLGRDSEERVRVERELFGRRISGLIGPEKTGIHRERMEEKEQWRVLMENAGFESVKLSNYAVSQA KILLWNYNYSNLYSIVESKPGF  
 OsMOCI MDHYSAVFEALEATVPPGSRERLAVEQEVLGREIEAAVGPSC-GRWWRGIER---WGGAARAAGFAARPLSAFAVSQA RLLLRLHYPSEGYLVQEA-RGA  
 PrSCL2 LEYFSAFFESMEPNMARDSAERLNVEKHFFAEKIMGIVAFEG-AERKIRLEGRDQWRIVMESAGFKFTNL SHYARSQA RILLYNY--CEAYSLDES-SGF  
 PtSCL17 LNHYSILFDSLEATLPPKSRERLDEQVWFGREITNIVALEG-HGRNERHQKFERWSELMNECGFTSLPLSEFALSQA RLLLRLHYPSEGYQLHT-QNKA

\*                    \*\*\*

LsLS FFLGWQNP LFSISSWR----

AtSCL4 ISLAWNDLPLLTLSSWR----

OsMOCI CFLGWQTRPLLSVSAWQPSSS

PrSCL2 LSLAWQNRPLLTVSAWCC--

PtSCL17 AFLGWQNSPLFSVSSWH----



# AtSCL26

LHRI

\* \* \* \* \* \* \* \* \* \* \* \* \* \* \* \*

AtSCL26 GLRLVHLLVAADASTGANKSRELTRVILARLKDVLSPGDRTNMERLAAHFTNGLSK-----  
PtSCL11 QQDLLQIILVKCAEALSEG--HHGLVRSVMVSKLQEFSSPLG-DPLQRI SFYVSEVLKN-----  
PtSCL16 GLRLIHLLTACAEAMLEG--AQDLVEVILCRLRQLVVSCTG-STMERVGYLFDALLH-----  
PtSCL19 GLRLHLLTACAEAKSLG--AQDLVEVILCRLRGLVVSPTG-FTMERVAYYVFDALLH-----  
PtSCL22 GLRLVHLLTACAEAMSQE--AQDVVEVILCRLRDLVVSPTG-SSMERVAYYLYHAL-----  
PtSCL23 GLRLHLLTACAEAISEG--TQDLAEVILCRLRGLVVSPTG-STMERVAYYLFNALVCS-----  
PtSCL24 GLRLIHLLTACAEAMSEG--AQDLVEVILCRLRQLVVSCTG-STMERVAYYLFDALLH-----  
PtSCL25 GLRLVHLLTACAEALSQG--AEDVVEVILCRLRELVS LTG-STMERVAYYLYHALH-SNVNSLVHNMEPNDKSSKYHFLGALKLLHVAYPIQIPHFTANQCILEAVAAA  
PtSCL26 GLRLHLLTACAEAMSQG--AQDLVEVILCRLQGLVVSPTG-STMERVAYYLYHAL-----  
PtSCL27 GLRLHLLTACAEALMSEG--AEDLVEVILCRLRGLVVSSTG-STMERVAYYLYRALLH-----  
PtSCL28 GLRLHLLTACAEAMCEG--AQDLVDVILWRLRGLVVSSTG-TMERVAYYLYRALLH-----  
PtSCL29 GLRLHLLTACAEAMSHG--AQDLVEVILCRLRQLVVSSTG-STMERVAYYLLDALLHY-----  
PtSCL30 GLRLHLLTACVEAMSEG--AEDLVEVILCRLRQLVVSCTG-STMERVAYYLFDALLH-----

VHIID

-----\*-----\*-----\*-----\*

AtSCL26 -----LLERDSVLCPOQHRDD---VYDQADVISAPELLQNMSF-YVNFGYLTATQATLEAVKYER-----RTHIVDYDINEGVQWASLMQALVSR  
PtSCL11 -----HSFVNVQEEENDEE-----SSLEYDLAYQAFYQLLP-YHKFLHFTSNQAIQEAVDNASN-----ITHIIDLEIRQGLQWPSFIQSLAHR  
PtSCL16 -----SNVNSLAH-LLELNDK-----TTKEHFLGALKLLHAAYP-YIRIPHFTANECILEAVVAVGGGNN-VGIHIIDFDIMEGMQWPPLMETLRNK  
PtSCL19 -----SNVNSLPH-LLELNDK-----ISKDHFLGALKLLHVAYP-YIRIPHFTANQCILEAVAG--AANN-VGIHIVDFDVMQWPPPLMEALRNS  
PtSCL22 -----ALLHSKVNSLAH-LLEPNDN-----SSKDHFLGALKLLHVYYP-YIQIPQFTAYQCILEAVAAGGSGNN-VGIHIIDFDIMEGMQWPPLMETLRNN  
PtSCL23 -----NNINSLGH-LLEPNDKSMSTSSAKEHFLGALKLLHVAYP-YIRIGHFTANQCILEAVAGTGSTN--VGIHIIDFDIMEGMQWPPLMEALRSN  
PtSCL24 -----SNVNSLPH-LLELSDK-----TAKEHFLGALKLLHVAYPY-YIRIPQFTANECILEAVVAAGGVNN-VGIHIIDFDIMEGMQWPPLMEELRNN  
PtSCL25 GGGSTMERVAYYLYHALLHSNVNSLVHNMEPNDK---SSKYHFLGALKLLHVAYP-YIQIPHFTANQCILEAVAAAGGNN-VGIHIIDFDIMEGMQWPPLMETLRNN  
PtSCL26 -----LQSNGLAH-LLELNDK-----SSKEDFLVALKLLHVAYP-YIQIPHFTANQCILEAVAAAGSDKN-VGIHVIDFDIMECMQWPPLMEALKSN  
PtSCL27 -----FNVDLSLAHLMPEPNDK-----SSNDNFLGALQLLHVAYP-YVRIPHFTANQCILEAVAGAGCTNNNVRTHIIDFDIMEGMQWPPLMESLKN-  
PtSCL28 -----SNADSFALHMEPTDE-----SSNDSFLGALQLLHVAYP-YVRIPHFTANQCILEAVAGAGGINNNVRTHIIDFDIMEGMQWPPLMESLKN-  
PtSCL29 -----SNVNINSLAH-LLELDDK-----TGKEHFLGALKLLHVAYP-YIRIPHFTANECILEAVVAAGGNN-VGIHIIDLFDIMEGMQWPPLMEALRNN  
PtSCL30 -----SNVNIDSLTH-LLELDDK-----TGKEHFLGALKLLHVAYP-YIRIPHFTANECILEAVVAAGGNN-VGIHIIDFDIMEGMQWPPLMEALRNN

LHRII

\* \* \* \* \* \* \* \* \* \* \* \* \* \* \* \*

AtSCL26 NTGPSAQHLRITALSRATNGKKSVAAVQ---ETGRRLTAFADSIGQPFYSYQCKLDTNAFSTSSLKLVRGEAVVINCMLHLPRFS-HQTPSSVISFLSEAKTLNPKLVT  
PtSCL11 PG-GPPKLLKITAIGQDEKR-----LQOTGRRLLEFAESMETAFAFHPVVVDLENLDESALNIEAHETIIVNCVSVLHRLICKSGK--IHGLLALLRKLNPVAVLT  
PtSCL16 ---DVRHLRITTIKWADDEEDEFRLYS---GHTGRWLSEYAAASAGIPFWEY--KMDLKGVD--ILPSQEGEIVVNCMWQLPHMLNLRNKSHLLEFLVGAHLLNPVAVT  
PtSCL19 GKNYDVSHLRITAIKWTEDEDDGCLLYS---GHTGRRLSAYASSVGI PFSFQ--EINLKALKE--VVPQETEIVIVNCIWQLPHMLNLRNKSQLLEFLVGSRRLLNPKAVT  
PtSCL22 G---VGYLRITAIKWDEDE-EECVVYSG---RHTGRRLSEYASSVGI PFSFE--ETDLKGLKEGLLPSREGEIVIVNCIWQLPHMVNLRNKSELMFLVGARHLNPEAVT  
PtSCL23 GD-YEIDLRLITTVKWVDDDDDAVLYTECKHTGRRLSEYAESLGIPFLFQ--ETDLKGLK--LMSDEGEIVIVNCMWQLPHMVNLRNKSQLLEFLVGARHLNPEAVT  
PtSCL24 ---YDVRHLRITAIKWADDEEDEFRLYS---GHTGRRLSEYATSAGIPFSYQ--ETDLNDMKD--ILPSEEGEIVVNCMWQLPHMLNLRNKSHLLEFLVSTRHLNPEAVT  
PtSCL25 GN-YDVAHLRITAIRWAEDN-EEWLLYSG---HTGRRLSEYASSVGLPFSFQ--EADLKEKELKEGLLPSREGEIVMVNCIWQLPHMVNLRNKSEVMEFLVSVRHLNPEAVT  
PtSCL26 GN-YDVGRRLRITAIRWAQD-GECPYLSG---HTGRRLSEYASSVGI PFSFQ--ETDLKGLKE--VLSHEGEIVIVNCMWQLPHMFLNLRNKSQLLEFLVSRHLNPKAVT  
PtSCL27 ---IDVAHLKITAIKWADEE-DECVLYS---GNTGRRLSEYASSAGIPFSYQ--ETDLEGLK--ILPSEEGEIIVVNCMWQLPHMLNLRNKSHLVQLFLVGARLLNPVAVT  
PtSCL28 ---IDVAHLTITAIKWAEEDEECVLYS---GHTGRRLSEYASSAGIPFSYQ--ETDLEGLK--IPLSEEGEIVVNCMWQLPHMLTLRNLKSHLLQFLVGARCLNPVAVT  
PtSCL29 ---DDVPHLRITAIKWPDDEEDQCLHYS--AHTGRRLSEYATSAGIPFSYQ--ETDLKGLND--ILPSHEREIVVNCMWQLPHMLNLRNKSHLFEFLVGSRRHLNPAVVS  
PtSCL30 ---DDVPHLRITAIKWPDDEEDQCLHYS--AHTGRRLSEYATSAGIPFSYQ--ERDLKGVKD--ILSSQEGEIVVNCMWQLPHMLNLRNKSHLFEFLVSTRHLNPEAVT

(AtSCL26 cont.)

PFYRE

SAW

AtSCL26 LVHEEVG--LMGNQGFLYRFMDLHQSALFDSLEAGLS-IANPARGFVERVFIGPWWANWLTRITA---NDAEVESFASWPQWLETNGFKPLEVSTNRCQAKLLLSLF  
PtSCL11 VMEIECN---QSMPTVGRFLQCLIFHRAVFNSEIAIVE-KNNPDRVLIERVYVAPNISNVLVHDKE---NSGMYACIDSWRKFLRHSGFKDPSLSNYSKCQANLLIGMY  
PtSCL16 LATGPHG-TESDSANFVDSLVRNLKELCAIFDSLEAGLP-EHGLARTMVERIFFGPAMSKRMSSAR-GDDRPADTTNSNVVDLPLRCGYEECNISNDNMIYAKYNVLMC  
PtSCL19 LATGPHG-AESGAADFNDFTRRRLWELCTIFDSLEAGLP-EHGLARAMVERIFFGPAMSRRTVSGTACGDHGAADTTKSNVVDLPIKCRYGEGSISSTIMYAKGTLCS  
PtSCL22 LATGAHG-AEGNMSNFLDSFSRCLEELCTIFDSLEAGLP-QHGLARAMVERFFFPGAMAKRIVSS---SACGPPDTRKSNVVDLPLECGYEGSISNDNMIYAKYTLQSG  
PtSCL23 VVTGPHGNDIAERGFIESFAGCLKDLCTIFDSLEAGLP-EHGLARAMVERMFFGPAMSRRLMKS-----PENGEENVVDIAVKCGYEGGTITSENVMYAKYTLELC  
PtSCL24 LATGPHG-IESETANFLESFARRLEELCAIFDSLEAGLP-EHGLARAMVERIFFGAAMSKRMSSAR-GDDRVADTTNSNVVDLPLRCGYEEGSI SNDNMINAKCNLLWN  
PtSCL25 VATGPHG-SEGNMSNFLESFCRCLEELCAIFDSLEAGLP-QHGLARAMVERFFFPGAMAKRIVNS---IECDPPDTRKSNVLDLPLECGYGEVSI SNDNMIYAKYTLHNC  
PtSCL26 LATGPHG-AERNRANFVESFCRCQLDLCAIFDSLEAGLP-HHGLARAMVERFFFGHAMAKTIVSS---SACGPPDNRKSNVVDLPLDCSY SAGSISKENMIYAKYTLQSV  
PtSCL27 LATGPHG-TESENTANFLESFVRRLEELCAIFDSVEAGLP-EHGLASAMVERFFFGPAMSKRMSSVR-GHDSPADTDSNVADLPLKCGYGGQGISNENMIYAKYSLPCS  
PtSCL28 LATGPHG-TESGTANFLESFVRRLEELCAIFDSVEAGLP-EHGLASAMVERFFFGPAMSKRVLS-----ASSDSDSRDSNVVDLPLFCGYGEGSISNENMIYAKYSLPCS  
PtSCL29 IATGPHG-TENESGNFVESFARRLEELCAIFDSLEAGLP-EHGLARAMVERIFFGAAMSKRVISSAR-GDDRPVDATNSNVVDLPLRCGYEECSVSNENMIYAKSSVLMC  
PtSCL30 LATGPHG-IESETANFLESFARRLEELCAIFDSLEAGLP-EHGLARAMVERIFFGPAMSKRMSSVR-GDDSLADIRD SNVVDLPLRCGYEECSISNDNMIYAKCNVLC

AtSCL26 N-----DGFRVEELGQNGLVLGWKSRRLVSAFWSAQTNQ-----  
PtSCL11 PN-----DSFKLHQDG-VSITLAWQDTPIVSVSVWTC-----  
PtSCL16 ---SVSGCYELEVELVGEHRLVVKSGCTPLVWVSTWKSPQL SEFDSLNFLEKN-----  
PtSCL19 ----GGNASYELEVELVGRHRLVVKWASTPLVWISTWKSVPN-----  
PtSCL22 VT-----GYELEVELVGDHRRVVLKVGCTPLVWVSTWKTTR-----  
PtSCL23 K---GSGRCYEVALVGRNRLVVKWASTPLVWVSTWKS-----  
PtSCL24 ---GSSG-CYGVELAGHRRVVLRWGSTPLVWVSTWKS-----SGIVRQGVPG-----  
PtSCL25 VGR----GSYDVELAGDHRLVVKWCTPLVWVSTWTTWK-----  
PtSCL26 GR----GSYEVEVMVDHRLVMKWGCAPLVWVSTWKS-----  
PtSCL27 ----GGRGCYEIEMVGDHRLVVKWGSTPLVWCGYSGWGISNENMIYAKYSLPCSGRRGCYEIEM  
PtSCL28 -----GSYEVEKLGDNRVVLKVGSTPLVWVSTWKS PSSHHDLTNQHWNDTDFILG-----  
PtSCL29 SG-SGSGGCYELEVELVGHRLVVKWCTPLVWVSTWKT PSSSCGYPIHVTN-----  
PtSCL30 ----GSSGCYEVEVMVGHRRVVLRWGSTPLVCSAWKSPSSSCISNRR-----
