# Supplementary material for: The GRAS gene family in pine: transcript expression patterns associated with the maturation-related decline of competence to form adventitious roots
Source: PubMed Central journal article supplement (PMC4302573; doi:10.1186/s12870-014-0354-8), 2014-12-30
Supplement: 12870_2014_354_MOESM4_ESM.pdf [file 12870_2014_354_MOESM4_ESM.pdf]

acidic basic Ser stretches

other stretches GRAS region

>PrSCR

MAACIAMNTRFRGGDASGEEVFVVGEDTSDNNSMIIPASGGENRRKRTGMELNGLPLFRFINPSSVYQGIKW
NNSISAGLRFSSQSPVPLASAGWQYPSATVSVSHRISAPSRPGLGLANSVLSEGNGQFPNGAYSNNMPFF
QNSNMRQVSSCSQWNKWSVVPQVVLGCGDGTGQQLSSLNAVQTMDEAAAAVWVGMIKILMMQSSPNVVS
MAQIIQSLQFIALYNPHIASVLYRRLSLGQSSFLGAGNTQIGRQONVGMNVSSDGRGFKRMDQSDHHRRE
MNSQQQIMVQWKSIGANPDSARRSARASQLDDDENRLLNIHGRGLVDQDQLRRGNDDLRLRIQSTESHDI
QRHQPPSALKLYLSSSGYDQTSWASSKQDFSETAFMANQSMWVQPRQPNNSQPPVLSLQHOANEDDPLRV
APSNNDYITMNRINTNSNQPSVNTQPPQQGSPSITASDEEGHLHLLALLLQCAEAVSADNFEANTILPQI
TELSTPYGNSVQVAAYFAEAM SARLVSSCIGMYSPLPPIHMSQSQKIVNAFQVFNGLSPFVKFSHTANQA
IQEAFEREQRVHIIDLDIMQGLQWPLGFLHILASRPGGPHVRI TGLGTSLEALEATGKRLSDFAH TNLNLPFE
HFPVADKVKLDEPERLQVNRGDALVHWHLSLVDTGSDTNTLRLLQRLSPKVI TVVEQDLSHGGSLSRF
VEATHYYSALFDSLGSYPEDSHDRHLVLEQQLLSREIKNILAVGGPARTGEVKFDNWRDQLKQTGFKPI SLA
GNAATQATLLLGMPFCQGYTLMEEENGTLKLGWGLCLLTA SAWRAHHLIY

>PrSCL2

MSMGGVNMNMNMSPWLSAPTAWQHDGLMSFFPGICTDVGGLCSSTTNSYLSGPNSVLILSRASMLFSPMQ
FQDFTQHLHDGIGAKQMPLLGGVPPAPAFKDNALYHHEALVKKERPPIKEPGVGDGSSAALRSSVFRSPLE
HTFGFSPVSNRNDFVSEVCTWMDCLMSLQPEAIAGNGNAATASCFSSNPCESTSSLEPNGSGYRR
HSSDDAAAWQSEFGILGAFKRSSPSTWTPDTTQLLCSSPSALLSAASSLLSTNSLKGKAAALOQYGG
AAGGGHFTQLHHRMPNVHQSPCPPKQQLIREPSTPQPKRQQGQDQDPLKGRREEDPKKPTIDALDRHMDC
QKSDLLHSLLDCAKIVDTEPERAGQSVAYLQRIASHHGDPQRIASHFADALAKRLSKGIEQKQFQSSDEC
SKSFEDLTLAYKLANFCADPCYSKFAQLTGNQAI LEAMDKAEBKIHVDFGIVQGVQWAAALLHAFATRPGGKPKH
IKITGIPAPTLGQNPTSSLLATGKRLTEFAKLLDLEFECFVSKHMSEVELSTLKEIQDECI AVNFMLQLYN
LLGDSPEPLVKILKLAHALSPKVVTLGEYEHLNACQFQVFRNLEYFSAFFESMEPNMARDASERLNVKE
HFFAEKIMGVIAFEGAEKRILEGRDQWRI VMESAGFKFTNLSHYARSQARILLYNCEAYSLEDESSGFLSL
AWQNRPLITVSAWCC

>PtSCL5

MAISEECNGGYSLLEWLDIGDESSMDPFINGSCPIAQDHDLFWAALPTMDIQSETQFVMEPSFSSN
SVAPAAQKGDASFWVPPVNVVSPKIKKKRKRARVSGSTGKGLWNVFNNAASPHTGSLDGNHCLA
PEFKLSSLHGASQNLLEATRNNSNNNNNNSSNNSKGRSGGRQSSPPNLPKESRWAEQLLNPCAVAIAN
NNIVRIQHLIWLHDLASISGDANHRHLAHLGLRAF TAKIMHPGASLPCSEFLSADPKLFHKALXQFHEVSPW
YQLLYTIANKYLEAFEDQNSKALHVIDIGVSHGIQWPTFMEALARRPAGPPSLRLTI IADTLGAPFSAGP
PSNDFPNRLKRYAKTLNLDMEVNVIAQPLDSL TREALGVKEDDEALAI CGQFRLHQLLGEGLDKNEGKDNQLT
SVSPNDFKIFKIDLNLVFFLSDNDIDHSSPDFIERFKNSVDHLWRFLDSTSVCFKGRECEERRMVEGEAA
MGLVNNVYDAGSRVERNENHLNWANRVREEGFVCEIPSDKIVDCARAMLRKHDSNWEMRLEDGCI SLCWKS
HPVTFCSLWKPCFNEPT

>PtSCL6

MKGLLIMGINHQAFQISRHPAVLFSKRMKLESGOYLVRNEAAAALSPQCFEATGGOIGWILSSGLG
QPSSVGLTAVTCQSNIVNSIKARQQLQFADTSRPPDCTRQVQCIIKNSPKLKSLSKLAFTPQLRSPSM
AATHREWNASTLNTNRSHYYEELSTAPADQOSWPLLGVSIAGLGNLGCHEASCMEQLLHCCSALENN
DVTLAQQIMWVLNIIASAEGDPNQRVTSFCFLRALIARAARMSNSNMLRAMAATANAHVGDTRKLSVIELAG
FVDLTPWHRFGFSSNGAIAAEVVEGYSVVHILDFGIAHCMQWPTLSDLSKRDPGPPYIRLTVSARPPVPP
LLNMSYEEELGTRLSNFARSVPVFEFRAIPDPDSEFFVLVDQLPDSILDI REGEALVINCQFRLHYIPDETA
DQQSCSSSSCQDEFLRIIRSEFPTIMTLVDEDSNLTSTSLVSRKLSAFNYLWIPFDALNTFLPRDSKQRQ
QYESDVGYKIENIIAFEGHQRIERLESKAKWTQMRKACFQISFSEDTVAEVKAMLDEHAAGWGLKKEEDD
LLL TWKGHNVVATAWVPSHL

>PrSCL10

MSLASPCQESMRGDLNSYRTNSWYRGNLSGVPPIISRNMGMQYMPGGIQLNLRGWGNSFRSCSTLSPKQNG
NFAIDHTSTTGERASAGTLKMIQRSPISPLSPKIGISGLPQTSRYRQYRERIQMHDLIHSNNHNGSF
NQQVYIHESEFPCNNILSRSSICIQSSGSPSSQHSQSYSSDTSRYFHSALDAAILVGNAYSNGQPANLKI
LEEIFTALLGFGDDPFLMAYAYCHTLNSNSWSLALSDFNDFLQTSNPGYSQINNASSRVFNLQQL
TNHGDRNVKRLHVTNVNVLKTEHFSPSSSMKLELIEELGSPQGDVKSLLIECAKAIADGRNADNLIIAGLRQV
VNIYGDPLHRHLAAVMVEGLVARLHFSGGHIYKTLKCKEPTSEBLLSYMHIIYEVCPYFKFGYVAANGAIAEA
FKDKDRVHIIDFQIAAQSQWVTLTQAFARQGGSPHVRITGVDDPQSEYARQGGNLNVLGERLSKLAESYQVP
FEFHGLSVFVSGDVHAEMLKIRPGEALAVNFPLQLHMPDES VNTSNHRDRLLRMVKNFSPNVVTLVEQEA NT
NTAPFFPRFMETLSY TAMFESLVDVTLPRDSKERSVSEVQHCLARDIVNVIACEGDERVERHELFGKWRSRLT
MAGFKSYPLSAHVNSTIKVVLNSYNENYRLIEKDEALYLGWLDRDLIVASAWK

>PtSCL12

MNGMLSRITSGNSLPPAQLKHQILQSKTSPDQAQRKRCSSVWQRSRSGGEIHTPTSVLDIRSPSPTLSSSL
GGSSSAGAVA AVSSGLLCAVSGGGGGSGSGGAEITLLSSGKAFNNGGGSTGSPARWYSNRCGSGNGG
REGFGWRLLNNGEQQGGGMVEGKSEVKKEDPQOHSRAEWEWGGGAGTAGGMNDLESMLEESGAAPPQSSL
MRWLLGIEFEPKDLPPPQIKSATSGGSTAPQFVPSIPNFAIPGAFAPNNLSDVIAAPQHASVPSFR
PSYATLPNLPQQQFI PPPPPPPPPPPPPFA YNGMPMPFPFGPNAYHPVLFSGPAVYGSNPVQHLGDPDFRFN
MAADPNRNNNNLLFMPHPPPPKRFLGELHQLWQOTFKQQEYNNMMKFPQQQQLLQSLHRRQQFLHQAPPPSP
HHQMRQKAVNVHTFKVGGSGAVADEVHVIIVEQLLKAEEAVELGNLDHAQAI LARLNQHLSPGLQLQRAAFY
FKEALASRI LNTTANTGDNRRNATVGTATSNISSPLDMVHKISAYKSFEASPLAQFAHTANQAFLEAL
EGAEA IHIIDFEIGLGGQWASFLQELAVLKGAPPVRI TALGSSASSSLELHLTRDNLNCFAKQLNVPFEFE
LLHFDHIESLTLREREAVAVNLSLLPSTFSSPDSISRLRLVKNLAPRAVVVD AETTATAAAA SAATSSA
SFVHHFLEALQFYSFLFDSLDAVNINMDAVHKIEKFLLPKIDATISSAGAPPWKT LFAAAGFSVPAFSNFT
ETQAEYLIQRLH SRGFVEVEKHAALLLGWQGRPLVSATAWRCGPPP

>PtSCL14

MIPMERAAKVLGSSPGHKNMGCSSSGVKIEPILIGLLANAGYTVKASLAHVAQRLEQLSIMGTVQIPGI
SHLASAVHYNPSLAGWISMFGLNPGADMPVFPFGRGLIDSSQVHKPIQDPSLSAMDALIHVYGLQ
FNGSQASNPGQFSPSSPVSRCNIFSGPPLRSGSTHTNFQARSPSAQSSDEGSSLSSTRLGT AQQSTING
AQESGIRVVHLLMGCAEAIQRNLLKVAADSLVREIRMTVNSAPCGAMGKVAHSHFVEALARRICGLNGBESNMS
QADAQSEILYHHYFVCPYLKFAHTANQVLEIALEAFEGHGSVHVIDLNLMLGFLQVALIQALALRPGPPLLR
LTAIGRPQPDGRDVLQEI GMKLAQFAESVNVVEFDFRGVMADKLEDIKPMMFQVKPGEVVAVNSVLQLHRLLY
MDAPTQSSPIDVVLKSIGSLRPKIVTVVEHEANNHGVFLDRDFVEALHYSTMFDSLEACNVLPNSMEKFLA
ELYIQKEICNIVACEGRYRIERHETLSHWRIRLGRAGFRP SHLGSNAFKQARMLLTLFSGEGYVEENNGSL
TLGWHSRPLIAASAWGSS

>PtSCL16

MEAGMQGASWFSHQWDHIFDSPPHVDWNSNTTTQSVAVQLDVLDAIHWLSWDLIENINASSVNMS
LPADLQAMEYLMADLQDNNMMEALISSPKDAIVFQSPIDSTAITRHHPALIAQOLVSKSIVTGNT
CSYSVVDHGSVEYKGLRLIHLHTACAEAMLEGAQDLVEVICLRQLVQSTGSTMTERVGYLFDALLHSNV
NSLAHLELNDKTKHEHFLGALKLLHAAYPYIRIPHFTANECILEAVVAVGGNNVGIHIIDFIMEGMQWPP
LMETLRNKDDVRHLRITTIKWADDEDEF LRYSGHTGRWLSEYASAGIPFWYEMKMDLKGVKDILPSQEGEI
VVVNCMQLPHMLNPRNKSHLLEFLVGAHHNLNPAVATLATPGHGTESDANSFVDSLVRNLKELCAIFDSL EA
GLPEHGLARTMVERIIFGPAKSRKVMSSARGDDR PADTNSNVVLDPLRCGYEENISDNMIYAKYNVLMC
SVSGCYEVELVGEHRLVMSGCTPLVWVSWTKSPQLSEFDSLNFLEKN

>PtSCL21

MVKDKSNDLGGAQNDKSNVIRICTKGEQQPWAQKDKRYVFNGNMEQTNLCLEQISVLACVTDGPMQRLAT
YFMEGLAARITLSPWGLYKALNSTHLQPSMADLV SARQVFTFLFPYLKFAFNTVDLILSMEKEKVHIID
LDASAAQWIPLLQSLRRRPGGPHLKMCTGINKKEVVQQTAAIILFEAEARLTI PQFNQLVLRTRDLRTDMD
LVAKTEGAVAISAVLQFHALLAEDQDFDHNFGGGGGGGGGGGGGGGGGGGGGVGVGNKRPRRQSCVTLGDDEDLI
LRSMFNMEALVKKEGSGVGRPKYSPSEIEAASSRRPNLEAAGARSNVVEVRNGRSTIVEGNIERFLRMLRG
LSPKVMVVVEQESNHNGEHLMDRFVEALYYYSAMFDSLESTLPRQSIERTVVEKYLFGKQIHNIVACEGSE
VERHEKLGWMMKRLDRGTGAQLPLGYTTLLHANNLLHTYTSHSYRLHHEGCLTICWEEERPLYSVSAWQSA
