# Supplementary material for: The GRAS gene family in pine: transcript expression patterns associated with the maturation-related decline of competence to form adventitious roots
Source: PubMed Central journal article supplement (PMC4302573; doi:10.1186/s12870-014-0354-8), 2014-12-30
Supplement: 12870_2014_354_MOESM5_ESM.pdf [file 12870_2014_354_MOESM5_ESM.pdf]

# SCR

|       |                                                                 |     |
|-------|-----------------------------------------------------------------|-----|
| PrSCR | MAACIAMNTRFRGGDASGEEV FVVGETDSNNSMII PASEGENRRKRTGMELNGPLFRRIN  | 60  |
| AtSCR | MA-----ESGDFNGGQPPPHSPLRRTTSSGSSSSNNGRPPPPPPPLVMVR              | 45  |
| ZmSCR | MP-----PPPPPPPLTPYCRRCPPPHLPPPPPPSSPNHFLH                       | 36  |
| PrSCR | PSESSDYGQIKWNNLSSGLRESQSPVPLASAAGWQYPSSATVDSVSHRISAPSRTPGGLGL   | 120 |
| AtSCR | -----KRLASEMSSNPDYNNSSRPPRRVS-----HLLDSNYNTVTPQQPPSLTA          | 89  |
| ZmSCR | YLHQLDHQEAAAAAMVRKRPASDMDLPPRRH-----VTGDLSDVTA AAAAGVGGSG       | 88  |
| PrSCR | ANSVLSGESNGQPFNGAYSNMFFQNSNMEROVSDSCSQWNKWSVVQPEVGLGCDGTGQ      | 180 |
| AtSCR | AATVSSQPNPPLSVC-GE SGLPVFP SDRGGRNVMMSV-----                    | 125 |
| ZmSCR | APSSASAQLPALPTQ-LHQLPFAFQHHAPEVDVPAHP-----                      | 124 |
| PrSCR | QLSSLNAVQTMDEAAA AVVVDGMIKDLMMQSS-PNV SMAQIIQSLQEIAL-YNPHIASVL  | 238 |
| AtSCR | QPMQDSSS--SSASPTVVD AII RDLIHSS--TSVSI PQLIQNVRDII FPCNP NLGALL | 181 |
| ZmSCR | APAAHAQAGGEATASITTAWVDGIIRDIIGSSGGA AVSITQLIHNVREI IHPCNPGLASLL | 184 |
| PrSCR | EYRLRSLGQSELGLAGNTQIGRDQNVGMNVSSDGRGFKRSMDQSDHHRDMNSQQQIMVD     | 298 |
| AtSCR | EYRLRSLMLLDPSSSS-----DPSPQTFEP                                  | 206 |
| ZmSCR | ELRLRSLLAADPAPLP-----PPQPQQA                                    | 209 |
| PrSCR | WKSIGANPDSARRSARASQLDDDENRLIDNIHGRGLDVDDQRLRRGNDDLRLRIQSTESH    | 358 |
| AtSCR | LYQISNNPSP-----QQQQHQQQ-----                                    | 226 |
| ZmSCR | LLHGAPAAAAPAGLTLPPPPPLPK-----                                   | 233 |
| PrSCR | DIQREHQPDSALKLYLDSSGYDQTSWASSKDQFSETAFMANQSMWVQPRQPDNNSQPPVL    | 418 |
| AtSCR | --QQQHKP-----PPPPI                                              | 237 |
| ZmSCR | --RRHEHP-----PPCQQ                                              | 244 |
| PrSCR | SLQHQANEDDPLRVAPSN DNYITMRRINTNSNQDPSVNQTPQQQG PSDITASDEEGLHL   | 478 |
| AtSCR | QQQERENSSTDAP--PQPETVTATVP AVQTNTAEALRERKEEIKR-----QKQDEEGLHL   | 290 |
| ZmSCR | QQQEEHPAPQSPKAPTAEETAAAAAAQA AAAAAAKERKEEQRR-----KQFDEEGLHL     | 299 |

# SHR

```
PrSHR      ----MDRLFTSRLADYCS-----EHPLSCFNSNKNCEDADTPRHIDSYNNHL 43
PtSCL6     MKGELEIMGINHQADFCISRHAPVLFSEKRMKLEESGOYLVRNEAAALSPQDCFEATGGQ 60
AtSHR      ----MDTLF--RLVSLQ-----QQQSDSIITN--QSSLSRTSTTTTGSPQ 38
OsSHR1     ----MDTLF--RLVSLQAA-----SE0000000SASYNSRSTTSSGSRSSSHOTNASY 47

PrSHR      SQFVLP-----SRRDKSRQCNS-----FMEDEDFSFKQ 71
PtSCL6     IGWILSESSELGQPSSVGLTAVTCQESNIDVNSIKARQOSLOFAD----TSDRPDCTRQV 116
AtSHR      TAYHYN-----FPONDVVEECFN-----FFMDEEDLSSSS 68
OsSHR1     SYHHSSNSGGGGGGGGGGYYGGQPPPSOYYYLEPYOEECGNAPHHQLYMDEFSSSS 107

PrSHR      FLPFKEMFNSNQTG-KGTTGENQFSGTRATSSRSSEVP----- 108
PtSCL6     QCIKNSFKLKSLSKLAFTPQLRSPSMAATHREWNASTDLNTRNSHYEELSTAPADQD 176
AtSHR      SHHHHHNNNPNTIYSPFTTPTQYHPATSSTPSSTAA-----AAALASPYSSSGHHN 120
OsSHR1     SRHFHHGARVOQQOPASSTPTGTAPTPLSTSSTAAGAGHGLFEADLSFPPDLNLDFS 167

PrSHR      DPSLFSELNPSF-PEEFGPAGSRRWASNLLLECARIAENEKSRTQHLLWMLNELSSPYG 167
PtSCL6     QSWPLLGVSIAKGLGNLGACHDASCMEQLLLHCSSALENNDVTLAQQIMWVLNNIASAEG 236
AtSHR      DPSAFSIPQTPP-SFDFSAN--AKWADSVLLEAARAFSDKDTARAQQILWTLNELSSPYG 177
OsSHR1     SPASSSGGGTAS-SGAVGGGGGGRWASQLLLECARSVAARDSQRVQQLMWMLNELASPYG 226
```

GRAS

# L1SCL

|         |                                                                |     |     |
|---------|----------------------------------------------------------------|-----|-----|
| PrSCL1  | M--ANEKNGTFDGSKSNHGSNKIGLQRSWLRRETAIPAAQFQGSLSQKTNGLSNNI       | GLQ | 58  |
| L1SCL   | MVKELKVDDFFTDWDAKNG-----FELGWQPFGIDHPTNFG-----DSPNGS           |     | 42  |
| AtSCL14 | M--G-SYPDGFPGSMDELD-----FNKDFLPPSSNQTL-G--LANGFYLDD---         |     | 41  |
| CsSCL   | M--SPNSEDQFSNLIIDEYT-----FNQLSPLPTTDLNFLEGPNLLSDVDLGF          |     | 45  |
| PrSCL1  | WSWLQHEAAMPAAQLQDSLSEKMNGLSDNIGSQRSWSQEEAVPAAQLLPAAQYQGSLS     |     | 118 |
| L1SCL   | --AHVSPNGSALVSPDASATSSNG-----                                  | NV  | 66  |
| AtSCL14 | --LDFS-SLDPPEAYPSQNNNNNN-----                                  | IN  | 64  |
| CsSCL   | --TSFEPSITPTDGPEGQPYDPPH-----                                  | VV  | 69  |
| PrSCL1  | SEQTITTTDGDSDDKETYSDIVLKYISDMLMDENMEDKKCMYQECALQATVKPFYDILG    |     | 178 |
| L1SCL   | SSSTSFEGDDVYADSEIFSDIVLSYINRMLNEEIIIDEKLDIFQGHPELEATEKPFYEILG  |     | 126 |
| AtSCL14 | NKAVAGDLLSSSSDDADFSDSLKYISQVLMEEDEEEKPCMFHDALALQAAEKSLYEALG    |     | 124 |
| CsSCL   | MPPTLQADSTTSPDDNDFSETVFKYMNQILMEENIENKPCMFYDPLGLKDEKSFYDALG    |     | 129 |
| PrSCL1  | ENYPPQGMCSKSKIGQNQNQLLNYTKDDVPYKIEDSSWIGEFFNSQ-----MPTGFESPL   |     | 233 |
| L1SCL   | EKYPPP---SDQPSMYN-NPSPETPDSNIYVKSSSSNSINSVVTSG---NWAFGAIELPQ   |     | 179 |
| AtSCL14 | EKY PSS---SSASSVDHPERLASDSPDGSCSGGAFSDYASTTTTTSSDSHWSVDGLENRP  |     | 181 |
| CsSCL   | QKNPPL---PNQNSLESPLSSSSSGDNGTNSTSSSSTVIDALLSDLGEHNYQPSLS-PP    |     | 185 |
| PrSCL1  | SANLSAGYSSQYSFSSSGSST-VIDGLPDSPIYEIN-----LSEYFSENKQDSGLG-E     |     | 284 |
| L1SCL   | NYLIPVDYSSQSSFGSTNSVHNAIEGLGPTMTN-----TEARDQFSEMLAEQFMRG       |     | 232 |
| AtSCL14 | SWLH-TPMPSNFVFQSTSRNSVTTGGGGGNSAVYGSFGDDLVSNMFKDDELAMQFKKG     |     | 240 |
| CsSCL   | PILG-EYNAVQSNFNPTDQSQ-FFGNLSDDSVNHFQDGL-AVMAQNIFTNSE SILQFRG   |     | 242 |
| PrSCL1  | FEEASQVVPKLN-MGISAENGRVMRAPKKETDLELKV GKREDAIGVPFQMNATHSDDENG  |     | 343 |
| L1SCL   | VEEARFKFLPKEDKLVINLEDNGISLPPKLMYDN---GLNEVKEEKEYTAYGSR-----    |     | 283 |
| AtSCL14 | VEEASKFLPKSSQLFIDVDSYIFMNSGSKENGSEVFKTEKKDETEHHHHHSYAPPPNRL    |     | 300 |
| CsSCL   | LEEASKFLPKSNNLVIDLESNTVSSSEWKKGDDL MVESLVVKGEKESDSSDGSR-----   |     | 296 |
| PrSCL1  | PKRQKDPHREDLDLEDRQSNKHS AVYSDNVIIR---TESFDEVLLCGGRNGKNEADMQVQV |     | 400 |
| L1SCL   | -GRKNRHS-DELDLEEGRSNKQSAVDYTEET--LRSEMSDLVLLCPNCDGKEGVSSKTWT   |     | 339 |
| AtSCL14 | TGKKSHWRDEDEDFVEERSNKQSAVYVEESE---LSEMFDKILVCGPGKPVCI LNQNFPPT |     | 357 |
| CsSCL   | -GRKNHER-EEIELEEGRSNKQTAVYVEESEETELSEMLHKVLLCTDAPPSLYGDNCEPL   |     | 354 |
| PrSCL1  | LQNGVQKSVQN-GSVKGSQG--PKTVGKKQGGKEVVDLRSLLLICAQVAADDTRGANET    |     | 457 |
| L1SCL   | QNEATRSPQN--GHTRGSGS--SKSRGKKPSKTEVVDLRTLIIHCAQTVAIDRRRSANDL   |     | 395 |
| AtSCL14 | ESAKVVTAQSNGAKIRGKKS--TSTSHSNDSKKETADLRTLVLCAQAVSVDDRRTANEM    |     | 415 |
| CsSCL   | QNDASKASPQTKGQVQGGANGGKGSRNKKQGGKKEVVDLRSLLLICAQAVSTGDGRTANEL  |     | 414 |

# PAT

|         |                                                               |     |
|---------|---------------------------------------------------------------|-----|
| PrSCL10 | MSLASPCQESMRGDDNSYRTNSWYRGNLSGVPEISRNMGMQYMPGGIGLNLQRGWGNFR   | 60  |
| AtSCL5  | MRLSVFIIPLVESRQASGIINKQST-----SLLIRFSLYLEASISTKSFFSKSQRIS     | 52  |
| OsCIGR2 | -----MADTPTRMIHPFSN-----IPSONLKQFQYSDNPQHPCHP-----Y           | 37  |
| AtPAT1  | -----                                                         |     |
| PrSCL10 | SCSTDLSPKQNGNFAIDHTSTTGERSAGTLKMIQDRSPISPLSPKGIQSDGLPQTSQSQR  | 120 |
| AtSCL5  | OTQSPICLSAN-----YYOPDNLDMEATOKHMIQEGSSMEYHQPSVVKQMDLSVQTFDSY  | 107 |
| OsCIGR2 | RAPSDTHVVPH-----HYGLKSHSPDAG-----YESOATPNKYTLD-----           | 73  |
| AtPAT1  | -----MYKQPRQELEA-----YYFEPNSVEKRLRY-----                      | 24  |
| PrSCL10 | LYSSERIQMDDDLIHSSSHNHGSFNDQVYIHESFPCNNELSSRESSICIQSSDGSPLSSQH | 180 |
| AtSCL5  | CTLESSSGTKSHPCLNKNNKNSST-----TSFSS-----NESPISQAN              | 145 |
| OsCIGR2 | -----SSEGAGCMRHDSPSS-----QSFTTR-----SGSPLS----                | 100 |
| AtPAT1  | -----LPVNNRKRFFCTL-----EPFP-----DSPP----                      | 45  |
| PrSCL10 | SQSYSSDSRYFHSAEDAADLVGNAYSGNGQPANLKILEEIEETALLGPDGDDPLDMYAYG  | 240 |
| AtSCL5  | NNNLSRFNNHNSPEENNNSPLSGSSATNTNETELSLMLKDIETAMMEPD-----        | 193 |
| OsCIGR2 | -----QEDSHSDSTDGSFVVGASCVTEDPN-DLKQKLDIEAVMLGPD-----          | 141 |
| AtPAT1  | -----YNALSTATYDDT--CGSCVTDELN-DFKHKIREIETVMMGPDS-----         | 85  |
| PrSCL10 | DHTLNSNSEWSLEALSDFNDFLDQTSNPGYSQINNADSSRVPDNLQQLTNHGDRNVKEET  | 300 |
| AtSCL5  | -----VDNSYNNQGGFGQQHG-----                                    | 209 |
| OsCIGR2 | -----SEIVNSLENSVANQLS-----                                    | 157 |
| AtPAT1  | -----LDLLVDCTDSFDSTAS-----                                    | 101 |
| PrSCL10 | VNEVNLKIEHFSPSSSDMEKLEIEELGSPQGDVKSLLEIECAKAIADGR--NADNLIAGLR | 358 |
| AtSCL5  | -----VVSAMYRSMEMISRGDLKGVLYECAKAVENYDLEMTDWLISQLQ             | 254 |
| OsCIGR2 | -----LEPEKWVR-MMGI PRGNL KELL IACARAVEEKNSFAIDMMIPELR         | 201 |
| AtPAT1  | -----QEINGWRSTLEAISRRDLRADLVSCAKAMSENDLMMAHSMMEKLR            | 146 |

GRAS

# AtSCL3

|         |                                                                 |     |
|---------|-----------------------------------------------------------------|-----|
| PtSCL21 | MVKDKSNDLGGAQNDKSNDVRICTKGQEQ-----QPWGAOKDKR-----               | 39  |
| AtSCL3  | MVAMFQEDNGTSSVASSPLQVFSTMSLNRPTLLASSSPFHCLKDLKPEERGLYLIHLLLT    | 60  |
| PtSCL21 | ---YVFNGNMEQTNLCLEQISVLACVTGDPMQRLATYFMEGLAARITKSWPGLYKALNST    | 96  |
| AtSCL3  | CANHVASGSLQANANAALQLSHLASPDGDTMQRIAAAYFTEALANRILKSWPGLYKALNAT   | 120 |
| PtSCL21 | HLQP-SMADLVSARQVFFTLFPYLKFAFNTVHLTILESMKEKVVHIIDLDASEAAQWIP     | 155 |
| AtSCL3  | QTRTNNVSEEIHVRRLFEMFPILKVSYLLTNRAILEAMEGKMOVHVIDLDASEPAQWLA     | 180 |
| PtSCL21 | LLQSLSRPPEGPPHLKMTGINEKKEVVQQTAAAILTEEAERLDIPFQFNQLVTRLDRLLTDD  | 215 |
| AtSCL3  | LLQAFNSRPEGPPHLRITGVHHQKEVLEQMAHRLIEEAEKLDIPFQFNPVVSRLDCLNVE    | 240 |
| PtSCL21 | MLAVKTGEAVAI SAVLQFHALLAEDQDFDHNFGGGGGGGGGGGGGGGGGGGRVGINRKRP   | 275 |
| AtSCL3  | QLRVKTGEALAVSSVLQLHTFLASDDDLMR-----KNCALR                       | 276 |
| PtSCL21 | RQSC TTLGDEDLILRSMENMEALVKKKEG SVGRPKYSPSEIEAAISSRRPNLEAAGARSNV | 335 |
| AtSCL3  | FQNNPSGVDLQRVLMMSHGSAAEAARENDSMNNNGYSPS-----GDSASSL             | 321 |
| PtSCL21 | EEVRNGRRSTIVEGNIERFLRMLRGLSPKVMVVVEQESNHNGEHLMDRFVEALYYYSAMF    | 395 |
| AtSCL3  | PLPSSGR-----TDSFLNAIWGLSPKVMVVTEQDSDHNGSTLMERLLESLEYTYAALF      | 373 |
| PtSCL21 | DSLESTLPRQSIERTVVEKYLFGKQIHNIVACEGSERVERHEKLGQWMKRLDRTGFAQLP    | 455 |
| AtSCL3  | DCLETQVPRTSQDRIKVEKMLFGEEIKNIIISCEGFERRERHEKLEKWSQRIDLAFGNVP    | 433 |
| PtSCL21 | LGYTLLHANNLLHTYTSHSYRLLHHEGCLTICWEERPLYSVSAWQSA- 503            |     |
| AtSCL3  | LSYYAMLQARRLLQCGFDGYRIKEESGCAVICWQDRPLYSVSAWRCK 482             |     |

GRAS

# DELLA

|         |                                                                |     |
|---------|----------------------------------------------------------------|-----|
| PtSCL14 | MDPMEERAAKVLGSSP-----                                          | 15  |
| PpSCL15 | ---MKRQHFRLQQQQQPQPNGHGRCSTVPVHFNPVSMPGSGPPPPSPRTTATAPAAGAA    | 57  |
| AtGAI   | ---MKRDHHHHHQD-----                                            | 11  |
| OsGAI   | ---MKREYQEAGSS-----                                            | 12  |
| PtSCL14 | -----GHKNMMGCSSSGVKIEPEIDGLLANAGYTVKASDLAHVAQRLEQLESI          | 63  |
| PpSCL15 | AAGGGGGSGSCKGKEVVLKDTST---KCGVGVDMELASMGYSVKSSSELEQVAHRLEQLEMM | 114 |
| AtGAI   | -----KKTMMMNNEE---DIDGNGMDELLAVLGYKVRSSSEMADVAQKLEQLEVM        | 55  |
| OsGAI   | ---GGSSADMGSCKDKVMAGAA---GEEDVDELLAALGYKVRSSDMADVAQKLEQLEMA    | 67  |
| PtSCL14 | MGT-----VQ---DPGISHLASEAVHYNPSDLAGWIESMFGEINFG---ADMPVVPFGDRGS | 113 |
| PpSCL15 | MCN-----GQE-DGIIISHLSEAVHYNPSDLGGWIESMLSELHVPILPPTDQPFQFPQA    | 167 |
| AtGAI   | MSN-----VQEDD---LSQLATETVHYNPAELYTWLDSMLTDLNFP-----            | 93  |
| OsGAI   | MGMGGVSAPGAADDGFVSHLATDTVHYNPSDLSSWVESMLSELNAPLPPIPPAPPAARHA   | 127 |
| PtSCL14 | LIDSSQVHKPIQDDPPLSAMDIALIHEYGLQ-----                           | 144 |
| PpSCL15 | AADQSSTVREASNSVPESSSTSTSKGTRSVQNV EQDQYRLMGPQGQGVVDNGIDRMFSNY  | 227 |
| AtGAI   | -----SSNAEYDLK-----                                            | 102 |
| OsGAI   | STSSTVTGGGGSGFFELPAAADSSSSTYALRP-----                          | 159 |
| PtSCL14 | -----FNGSQASNPQGFSPDSDPSVRCNIFSGPPLRSGDSTTHTNFQARSFSAQSS       | 195 |
| PpSCL15 | GGLFSQVLDVSDLLVDDPDVLQEPPEASPTLLLQSSSNSSLEVQSGLDHLEEDVTGR      | 287 |
| AtGAI   | -----AIPGDAILNQFAIDSASSN---QGGGGDTYTTNKRLKCSNG-----VVETT       | 146 |
| OsGAI   | -----ISLPVVATADPSAADSARDTKRMRTGGGSTSSSSSSSSSSSLGGGASRGSVVEAA   | 212 |
| PtSCL14 | DEGSSLSSTRLGTAQQSIDN--GAQESGIRVVHLLMGCAEA                      |     |
| PpSCL15 | EQKRYRVCDPQLSERTVVVVMGADPHESGVRLVHTLMACAEA                     |     |
| AtGAI   | -----TATAESTRHVVLV--DSQENGVRLVHALLACAEA                        |     |
| OsGAI   | PPATQGAAAANAPAVPVVVV--DTQEAGIRLVHALLACAEA                      |     |

GRAS

# HAM

|         |                                                               |     |
|---------|---------------------------------------------------------------|-----|
| PtSCL12 | MNGMLSRTSGNSLPPAQLKHQILOSKT-----SPDQAQKRHCKSSVWQ              | 43  |
| PtSCL13 | ---MLDRN--TETRPPLLNLKLVQSSS-----IPAQANNKR-----P               | 32  |
| PhHAM   | ---MIAIPQGAKGVLGVSSFMPSISSEEQICKKDANFARNDPQICKKDGNFARNEPQICK  | 57  |
| AtSCL6  | ----MPLPFEFQKGKGISCFSSFSSS-----FPQPPSSPLLSHRKARGGEE           | 42  |
| AtSCL22 | ----MPLPFEQFQKGVLGFLDSSSSP-----GYKIWANPEKHLHGRVEEDLCF         | 44  |
| PtSCL12 | RSRSGGEIEPTSVLDIRSPSPTSTLSSSLGGSSSESAGAVAAVSSGLLCEAVSDGGGGGSG | 103 |
| PtSCL13 | YVRSEYQSEPTSVLDIRSPSPTSTLSVSFGGSTD-----GGFFRENACDG-----       | 77  |
| PhHAM   | KEGNFTRNEPVSVDLTRSPSPSSSSCSYAGKVEG-----                       | 91  |
| AtSCL6  | EEEEVPAAEPTSVLDSLIS-SP-----TSSSTVSSS-----                     | 71  |
| AtSCL22 | VVNNGGFSEPTSVLDSVRSPSPFVSSSTTTLSSS-----                       | 78  |
| PtSCL12 | SGGAETLLLEFSSGKEAFNNGGGSTGSPARWYSNRGGSGNGGREGFGWRLNNGEQQPGGGG | 163 |
| PtSCL13 | -----QLLDCIGVMSKDGGN-----WQLQN-----                           | 98  |
| PhHAM   | -----                                                         |     |
| AtSCL6  | -----                                                         |     |
| AtSCL22 | -----                                                         |     |
| PtSCL12 | MVEGKSEVKKEDPQQHSRAEEWGSSGGGAGTAGMDDLESMLFESGAAPPIQSLMRWLL-G  | 222 |
| PtSCL13 | -----VIRNENEFQVAETEAVNVN--PNVSMGMEYLENILLQS-PEGNNNSHIPCLM-G   | 148 |
| PhHAM   | -----QKEELVKELQPFPLVGLPEKCSLGFGLDNLPLP-E-LCGADQTLRWIS-G       | 140 |
| AtSCL6  | -----HGGNSAVGGGGDATIT--DEQCGAIGLGDWEEQVP--HDHEQSIILGLIM-G     | 116 |
| AtSCL22 | -----HGGPSGGGAAAATFSGADGKCDQMGFEDLDGVLSSG-SPGQEQSIFRLIMAG     | 129 |
| PtSCL12 | EIEDP-KDLPPPQIKSATSG-GSTSAPOFVDPSIEPNFA---DPGAFAFSNNNLSVDIAP  | 277 |
| PtSCL13 | EPCLMGNEYPLQGIKAEAVLQQTHFNEATDSQLSEFFCGNSDIGPYSFFGDNAGHTISP   | 208 |
| PhHAM   | DMEDPSVSLKQLLLGGNANGFHGSSGFEASAAGSLVHTDNVSESGSDVSLNANIEKIGSV  | 200 |
| AtSCL6  | DSTDPSLELNSILQT-----SPTFHSDSYSSPGFG--                         | 146 |
| AtSCL22 | DVVDPSSEFVGFDIG-----SGSDPVIDNPNFLFGYG                         | 161 |
| PtSCL12 | PQHASVPSSFRPSYATLPNLPPQQCFIPPPPPPPPPPPPPFAFYNGMPTPFGPNAYHPEVL | 337 |
| PtSCL13 | FALNPTSTALFP-----PSNALITPNIHGNPPPLSFTPD-FKTFKVPLDEKHPELQ      | 259 |
| PhHAM   | IDSNGRPSNGFD-----YLNANLYAKSLPLPPASSFQEQKLGQKQPSFSPNQA         | 248 |
| AtSCL6  | -----VVDTGFLDHHVPPSH-----                                     | 163 |
| AtSCL22 | FPFQNAPEEEKF-----QISINPNPGFFSDPPSS-----                       | 190 |
| PtSCL12 | FSGPAVYGSNPVQHLGPDFPRFNMAADPNRNNNNLLFDMPHPPPKRFRGLEHQLWQOTFK  | 397 |
| PtSCL13 | LP---YGNP-----PSYP-----EKNVVFMPAAPRG-HVGVAHEGFPEFEK           | 297 |
| PhHAM   | LFQNASYGNM-----FDSSSYDDTNQEQPPSKRHNSGTLGSSVGGI                | 289 |
| AtSCL6  | -----VSGLLINQSQTHY-----                                       | 176 |
| AtSCL22 | -----PPAKRLNSGQPGS-----                                       | 203 |
| PtSCL12 | QQEYMNMMKPPQQQELLOSLHR--RQOFLHQAPPPSPHHQMRQKAVVNHTFKVGG---SG  | 452 |
| PtSCL13 | SLHWQQTQQREFQPAWKTMINRSVRDPLFSAVKQEWPGRTHQGRVDLDEVQKS-----    | 350 |
| PhHAM   | LPKVFFFDPSGDLSMRRQLIGEMQHFNLLPPQQFQPKPLIVPKLEAACCGGNGSLMVPR   | 349 |
| AtSCL6  | -----TONPAAIFY---GHHHTPPPAKRLNPG-----                         | 201 |
| AtSCL22 | -----OHLQWVFPFSDPGHESHDPFLTPPKIAGED-----Q                     | 234 |
| PtSCL12 | AVADEVHVIVEQLLKAAEA                                           |     |
| PtSCL13 | -----AILQQLLNATNY                                             |     |
| PhHAM   | HQQEQQFIYDQIFQASEL                                            |     |
| AtSCL6  | -----PVGITEQLVKAEEV                                           |     |
| AtSCL22 | NDQDQSAVIIDQLFSAAAE                                           |     |

# LsLS

PrSCL2 MSMGGVNMNMNMSPWLSAPFAWQHDGLMSFPPGICTDVVGDLCSTTTNSYLSEPNVLDL 60  
LsLS -----  
AtSCL4 MAYMCTDSGNLMAIAQQVIKQKQQEQQQQQHHQDHQIFG----INPLSIINPWPNTSLGF 56  
OsMOCI -----

PrSCL2 SRASMLFSPMEQFQDFTQHLHDGIGAKQMPLLLGGVEPPAPAFKDNALYHHEALVKKERPP 120  
LsLS -----  
AtSCL4 GLSGSAFP-----DPFQVTGGGDSNDPGFPPFNLDHHHATT----- 92  
OsMOCI -----

PrSCL2 IKEPGVGDGSSAALRSVFRSPELHTFGFESPVSNRNDFVSPDVCTEWMDCLMSDLQPEA 180  
LsLS -----  
AtSCL4 -----TGGG-----FR---LSDFGGG---TGGGEFES-----DEWMETLIS----- 122  
OsMOCI -----

PrSCL2 IAGNGNAAIASCFDSSNPCESTESSELPNGGSGYRRHSSEDAAAWQSEFGILGEAFKRS 240  
LsLS -----  
AtSCL4 -----GGDSVADGPD-----CDTWHDN-----PDYVIYGPDPFDY 153  
OsMOCI -----

PrSCL2 PLSWTPTDTTTEQLLCSSPSADLLSAASSELLSTNSLKGKAALOEQYGAAGGGHEFOTLH 300  
LsLS -----  
AtSCL4 PS-----RLSVQPSDLN-----RVID 169  
OsMOCI -----

PrSCL2 HRMPNVHQSVCPKQQLIREPSTPPQKRQOQQEQDPLKGRKREEDPPKPEIDALDRHMQG 360  
LsLS -MLGSFGSSSSQSHPHHDEESSDHHQORRFTATATTIT-TTTITTSPIAQ----- 48  
AtSCL4 TSSPLPPPTLWPPSSPLSIPPLTHESPTKEDPETNDSEDDDFDLEPP----- 216  
OsMOCI -MLRSLHSSSSSDTDNNSGGCKNNGGGGGEAAAAVEGGDQRAVAAAAPS----- 49

PrSCL2 QRSDLLHSLLDCAKIVDTEPERAGQS--VAYLQRIASHHGDPQRIASHFADALAKRLSK 418  
LsLS ----IRQLLISCAELISQSDFSAAKR-LLTILSTNSSPFGDSTERLVHQFTRALSLRLNR 103  
AtSCL4 ----LLKAIYDCARISDSDPNEASKT--LLQIRESVSELGDPTEVAFYFTEALSNRLS- 269  
OsMOCI ----TRDLLLACADLLQRGDLPAARRAAEIVLAAAASPRGDAADRLAYHFARALALRVD- 104



# AtSCL26

AtSCL26 -----MNPYPYEDFLDLFFSTHTDP----- 19  
PtSCL11 MVSRLQSPSPSCCKATMSTISYNSHAPSFQFYONPSSDWLLHNKAMDIQSHHQHQQFLFWE 60  
PtSCL116 MEAGMQGASWFSEH-QWDHIFDSPPHVDWDSNTTTT 35  
PtSCL19 METGMAGTPWLSEQ-VWDHIFYNPPHADWYGNTNTHSAA 38  
PtSCL22 -----MGSMEDGT-GTSWFSEQFDWDHVFTSLPQVDWDTNSA----- 36  
PtSCL23 -----MQETGMGSYNSWFSEQ-EWDHVFSSNNPPDGGITYDVAE 37  
PtSCL24 --MWNMGSSMEAAT-GASWFSEH-QWDHVFDNPPHVDWDTNTTTT 41  
PtSCL25 -----MCGVEDGTGTTLFSEK-DW-HY--SLLDVDWDTNSP----- 32  
PtSCL26 ---MSSVSSMEAGS-GTAWFSEL-ELDHLFTSLPHEDWDSNSA----- 38  
PtSCL27 -----MAASWFCEQ-EWDHIFNLLPPVDSDTDTNYT 30  
PtSCL28 -----MEATMAAAWFCEQ-EWDHIFNLLPPVDWDTDTNNT 35  
PtSCL29 -----MEAAT-GASWFSEE-DLDHIFNTLPRVDWHTNSPST 34  
PtSCL30 -----MEAGM-GASWLSEY-HWDHLFDNPP---HVDTPST----- 30

AtSCL26 -----LATAASTSSNGYSLNDDL-IDW----- 35  
PtSCL11 PTPLLPANHKLNPFTAFPPPTSLESIELSKSDADYTSLWESRQIDQKQHISALILRASERD 120  
PtSCL116 -----QSVAVEQLDVLDAIDWLS-WHDLIID-----INASSVN 69  
PtSCL19 -----AAAAEEQMDVLDAAECPS-WGDLIINK-----SNGCTVN 72  
PtSCL22 -----AVEQLDVLDTAQWSP-WDDLIVDD-----NH----- 62  
PtSCL23 -----GEQLMDVLDLDAPEWSS-WDDLIDVD-----INGCSGD 69  
PtSCL24 -----QSTAV---DVLDAVDWSS-WDNLIIDH-----VNGCSVN 72  
PtSCL25 -----AVELPDVHLDAQWSS-LDDLIVDD-----NHGCSFN 63  
PtSCL26 -----ALGHLHMDLDGAQWSS-WDDLIPD-----NNGCSVN 69  
PtSCL27 -----PSTPVQQLGADLDAVDWLS-WDDLIDN-----GCSLN 61  
PtSCL28 -----PSTPVQQLGADLDAEWSS-WHDLIID-----DCSLN 66  
PtSCL29 -----AVEELM---DVELDTAEWSS-WDDIIDH-----NNGGSFS 66  
PtSCL30 -----ALQQL---EVVFDAEWAS-WDDLFIN-----GCSVN 58

AtSCL26 -----DCDFRDVIESIMDEGAMMEPE-----SEAVPMLHDQ-----EGL 75  
PtSCL11 YLENKVDFCDNVSSTVTDEKYVLDGLYQGFDEEGGIVPSKAFGELPFPPFFDDGIDVISF 180  
PtSCL116 N-----MSLPADLQAMEEYLMDAELQDDNNN-----MEEALISSPRKDAI-VFQSP 114  
PtSCL19 ND-----QTLPADLQAIREYLLDEEVQDYDSN-----IQED--PSPGRDASDPVKNS 117  
PtSCL22 -----SLPTELQVIGEHEVIDIDLQEDDNK-----IEEYSSISRRRDAN-VFQCP 105  
PtSCL23 TSNSNPSPNPSLPANLQAIIEHLMDELQDVNNN-----FQEDAVSCPRIDDAIVANSS 123  
PtSCL24 N-----LSLPADLPEMGAHLMDAELQNDNNN-----SEEDLISSPRKDAI-FFRPP 117  
PtSCL25 N-----LLLSTELEAAGEYLIDARRRDDNNN-----IEEDPIWRPOIDPI-FFOCP 108  
PtSCL26 K-----LSLPTDLLAIEKYLKYTDVQDDNIN-----IEEDPISSPRSDAN-VLQIP 114  
PtSCL27 N-----VSLPADLQTIIEEYLMDEGLQDDSDN-----MEQDLISSPTNDAMTVFQCP 107  
PtSCL28 N-----LSLPADLQTIIEEYLMDELQDDSDN-----MEQDLISSPTNDAMTVFQCP 112  
PtSCL29 N-----LPLPADLKTIEEYLMDELHDGYNN-----EEDNLISSPPKDAI-VFQCP 111  
PtSCL30 N-----LSG-----EYLMDAELQDESNN-----IEEDHILSHRKDTI-IFQHT 95

AtSCL26 CNSASTGLSVADG-----VSFGEPKTDESK 100  
PtSCL11 LGNTQNPCSPSDHSEAVGSIGSCSSASLNSIDKFGNEFVLRDEYPSEFEAVLGLQVPLLG 240  
PtSCL116 IDSTDAITLRHPALIAGDQLVS-----KSIVTGNTCSYSVDVDHGS---VEYK 159  
PtSCL19 GPKAGDQLLSDTGLVTNSSSESKSNETEKLK--SGSGSGSGSSSVEVDDGALKDSEYK 175  
PtSCL22 INNEY-PAALIAA---NQPLS-----YSGPPSVDVDHGALEDMEYK 142  
PtSCL23 CKSIETDNAGSSS---VDIDHAG-----SHENRASKDLKTIS--EVEYK 162  
PtSCL24 IDSTDPVTLQHPALIAGDQLVS-----KSTVTDNTGSSSVDVDHGS---VEYK 162  
PtSCL25 VDELHHPAALIAA---DRSLSD-----FAVVTNKSVPVSLIDHGAFEETEYK 153  
PtSCL26 IDNEHPAEDQLFS---GSAHV-----VTNKGDTSSLNIDHGSLQDMECN 155  
PtSCL27 IDSSADLVTPEHP--AGDQLVQT---NSSSSESKSMERHNAGSSSVDVSDSS---LEYK 158  
PtSCL28 IDSSADPVTLEHP--AGDQLVQT---NSSSSESKSMVTDNPGSSSVDVSDGS---LEYK 163  
PtSCL29 VDSTDPVNFDOPTLITGDQLVSDYAVTNSSS--ELKSIVTENAGLSSVDVDHGS---VEYN 167  
PtSCL30 IDSADTITSEQSGVIPRDQLVSDYTATDSS--RSESIAPNKADSSSVDVDHGS---VEYK 150
